# Supplementary material for: Polymerization Initiated by Graphite Intercalation Compounds Revisited: One-Pot Synthesis of Amphiphilic Pentablock Copolymers
Source: MDPI journal article supplement (doi:10.3390/macromol2020012), 2022-05-14
Supplement: s1 [file s1]

Archive with 1 entries (1 files):
- macromol-1653418-supplementary.pdf
