# Supplementary material for: Polymerization Initiated by Graphite Intercalation Compounds Revisited: One-Pot Synthesis of Amphiphilic Pentablock Copolymers
Source: MDPI journal article supplement (doi:10.3390/macromol2020012), 2022-05-14
Supplement: s1 [file s1 › macromol-1653418-supplementary.pdf]

# Polymerization Initiated by Graphite Intercalation Compounds Revisited. One-Pot Synthesis of Amphiphilic Triblock ABC Copolymers<sup>†</sup>

Nikolay G. Vladimirov <sup>1</sup>and Ivan Gitsov <sup>2,3\*</sup>

<sup>1</sup> Versogen, Inc., 200 Powder Mill Road, Wilmington, DE 19803, USA; nvladimirov01@yahoo.com

<sup>2</sup> Department of Chemistry, State University of New York – ESF, Syracuse, NY; 13210; USA

<sup>3</sup> The Michael M. Szwarc Polymer Research Institute, State University of New York, Syracuse, NY; 13210; USA

<sup>†</sup> This paper is dedicated with best wishes to Professor Iliya Bl. Rashkov on his 80-th birthday

\* Correspondence: igivanov@syr.edu; Tel.: 1-315-470-6860

## Contents:

|                                                                                                   |     |
|---------------------------------------------------------------------------------------------------|-----|
| Graphite intercalation compound KC <sub>24</sub> .....                                            | S02 |
| Calculation of comonomer content based on integral intensities in <sup>1</sup> H NMR spectra..... | S02 |
| SEC 3D chromatogram of products extracted by cyclohexane from the copolymerization mixture.....   | S03 |
| SEM images of initiator delamination during polymerization.....                                   | S03 |

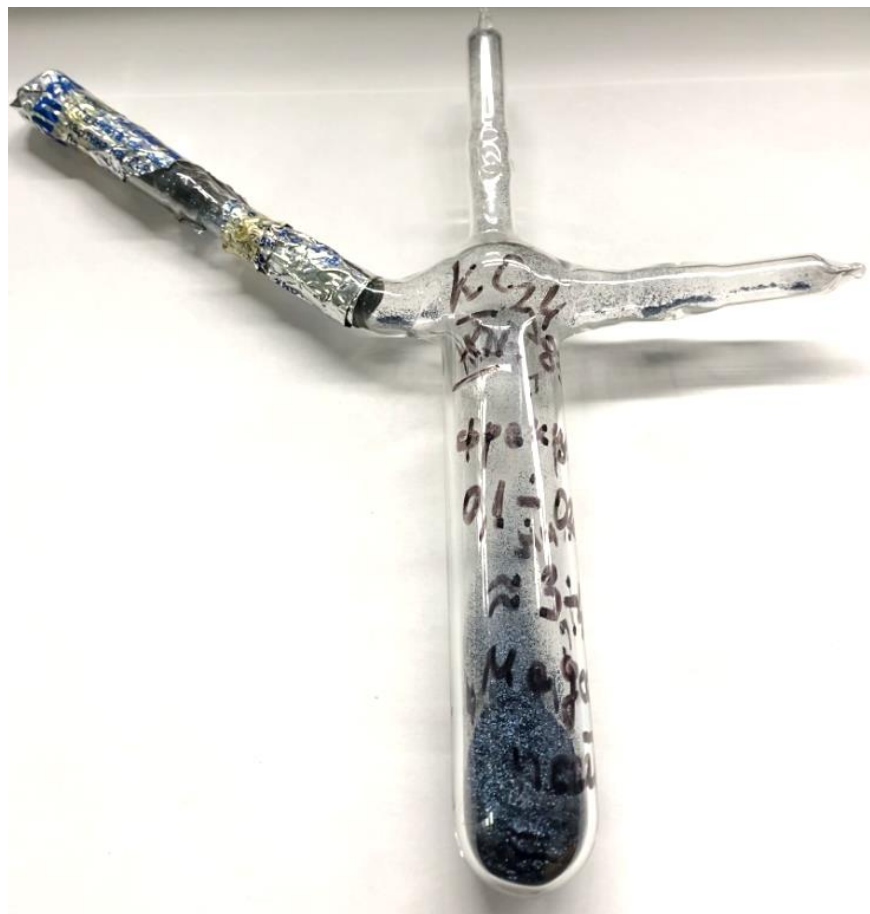

**Figure S1.** Break-seal ampoule with Madagaskar graphite intercalation compound  $KC_{24}$ . Synthesized - December 1989; picture taken - April 11, 2022.

**Calculation of the styrene (St), methyl methacrylate (MMA) and ethylene oxide (EO) molar fraction in the ABC copolymer using  $^1H$  NMR spectroscopy.**

A –integral intensity of St aromatic protons (5 H, 7.25-6.35 ppm); B - integral intensity of MMA  $-C(\underline{CH}_3)-$  protons (3H, 1.3-0.6 ppm); C - integral intensity of EO  $-CH_2CH_2O-$  protons (4H, 3.64 ppm).

$$St \text{ molar fraction} = \frac{\frac{A}{5}}{\frac{A}{5} + \frac{B}{3} + \frac{C}{4}}; MMA \text{ molar fraction} = \frac{\frac{B}{3}}{\frac{A}{5} + \frac{B}{3} + \frac{C}{4}}; EO \text{ molar fraction} = \frac{\frac{C}{4}}{\frac{A}{5} + \frac{B}{3} + \frac{C}{4}}$$

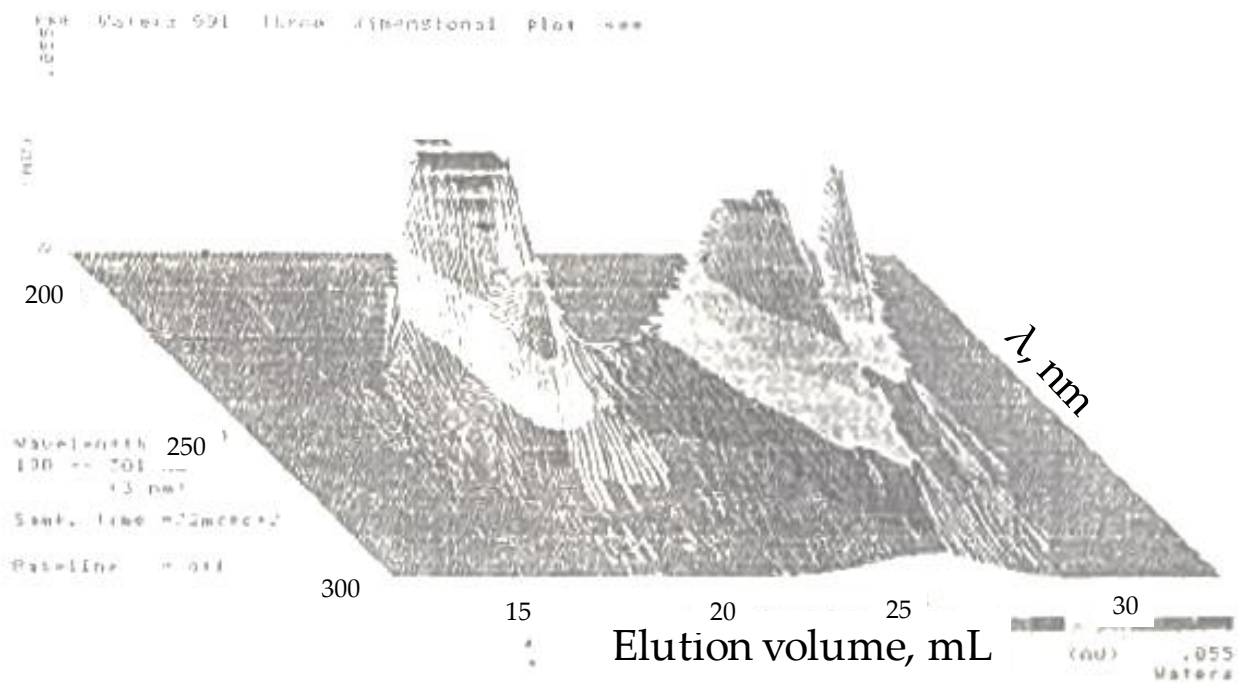

**Figure S2.** Size-exclusion chromatography of cyclohexane fraction extracted after consecutive addition of comonomers St – MMA – EO and bulk copolymerization (STEM 2, Table 1). 3D plot from the M991 UV-PDA Waters detector.

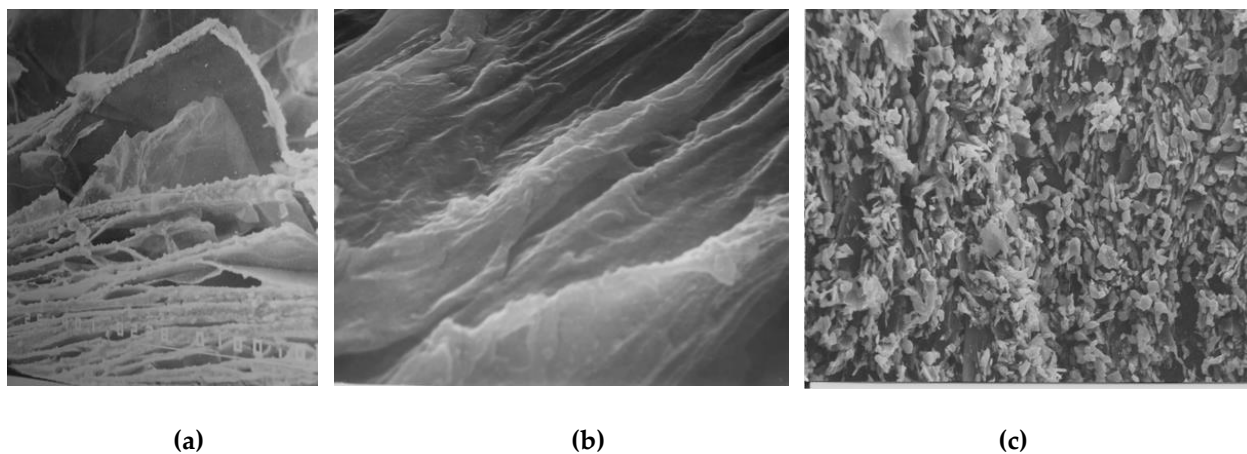

**Figure S3.** Delamination of HOPG KC<sub>24</sub> during polymerization monitored by scanning electron microscopy. JEOL Super-probe 733 (JEOL Corporation, Japan). (a) Initial stage – graphene sheets start to separate with polymer protruding. Magnification 100×. (b) Final stage – sheets fully embedded in the polymer. Magnification 1100×. (c) Delaminated HOPG after polymer dissolution and extraction. Magnification 800×. HOPG - highly oriented pyrrolytic graphite (Union Carbide, USA).
